# Supplementary material for: Bacterial O-GlcNAcase genes abundance decreases in ulcerative colitis patients and its administration ameliorates colitis in mice
Source: HighWire-hosted journal article supplement (doi:10.1136/gutjnl-2020-322468), 2020-12-12

**Supplementary Figure 5.** Correlation analysis of the relationship between the abundance of OGAs-encoding genes and species abundance in samples from Spain-IBD cohort (A) and USA-IBD cohort (B). “\*” indicates OGA encoding species. Spearman correlations with FDR  $P < 0.05$  were shown.

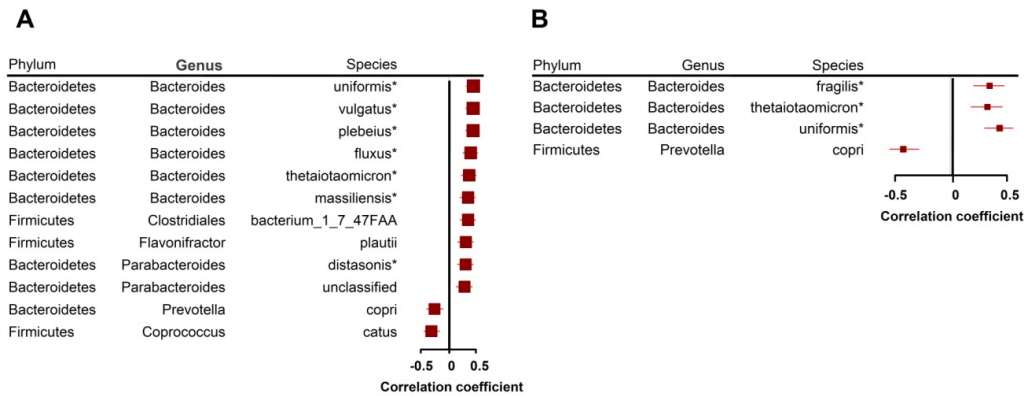

Supplement: gutjnl-2020-322468supp006_data_supplement.pdf [file gutjnl-2020-322468supp006_data_supplement.pdf]
