# Supplementary material for: Bacterial O-GlcNAcase genes abundance decreases in ulcerative colitis patients and its administration ameliorates colitis in mice
Source: HighWire-hosted journal article supplement (doi:10.1136/gutjnl-2020-322468), 2020-12-12

**Supplementary Figure 9.** Shannon entropy plots for the NAGIdase domain sequences from metagenomic OGA sequences retrieved from UC, CD or control. The higher entropy value for each amino acids means the higher variation between samples. The ligand binding sites are marked in blue (whose catalytic function has been experimentally validate) or red (whose catalytic function were only bio-informatically predicted).

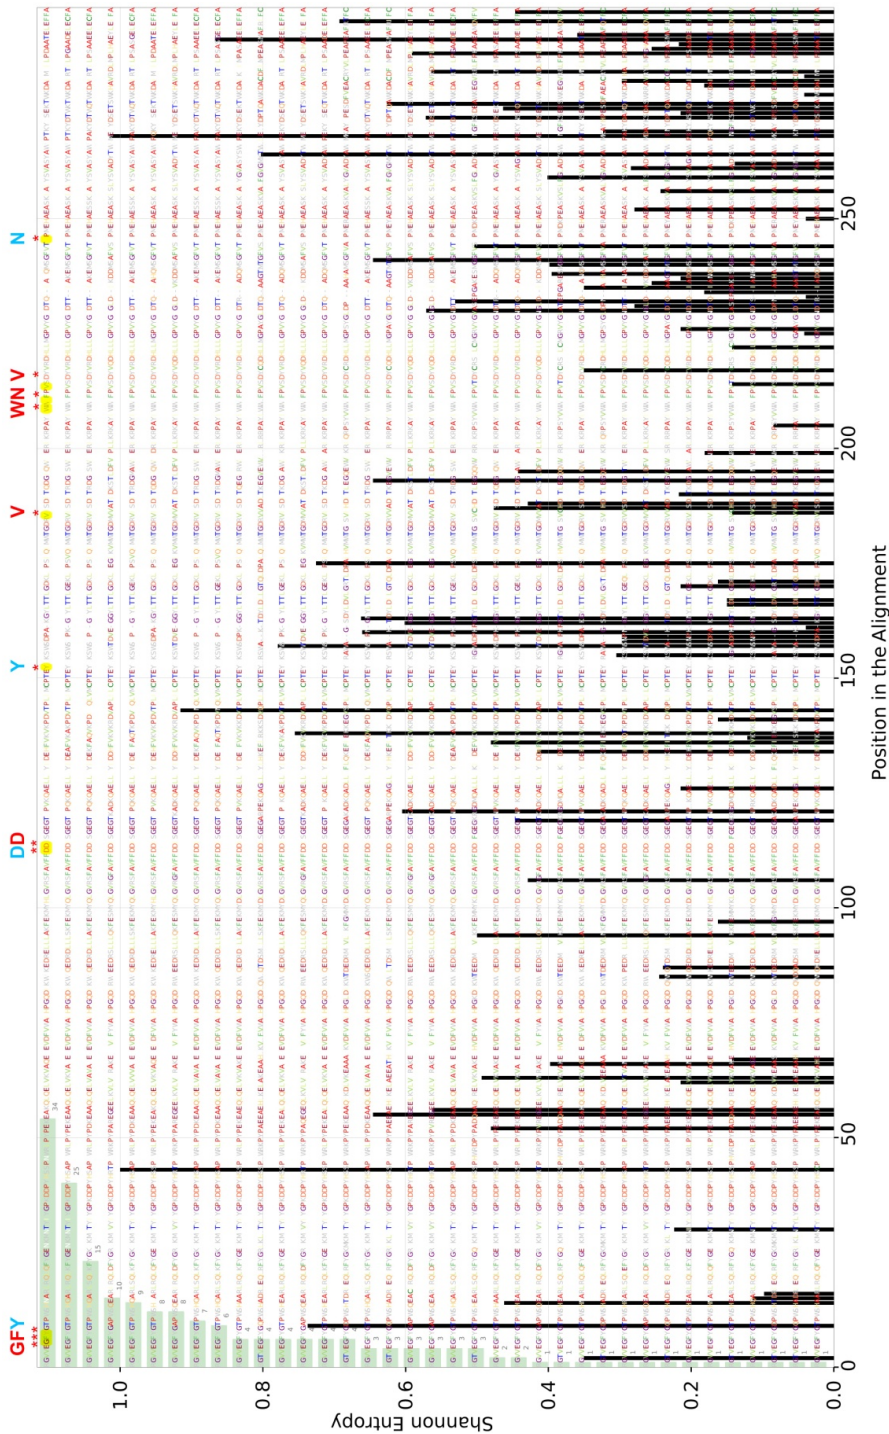

Supplement: gutjnl-2020-322468supp010_data_supplement.pdf [file gutjnl-2020-322468supp010_data_supplement.pdf]
