# Supplementary material for: Bacterial O-GlcNAcase genes abundance decreases in ulcerative colitis patients and its administration ameliorates colitis in mice
Source: HighWire-hosted journal article supplement (doi:10.1136/gutjnl-2020-322468), 2020-12-12

**Supplementary Figure 10.** The protective effect of bacterial OGAs against DSS colitis when administrated at different time points. (A, F) Schematic outline of the DSS-colitis model and the treatment approach of BtGH84 (A) and AkkGH84 (F). (B-E, G-J) Disease severity of DSS-colitis mice: body weight change (B, G), colon length (C, H); histology manifestation on H&E staining (D, I), scale bar: 200  $\mu$ m and inflammation score (E, J). Data represent the mean of three repeats per group with the SD; \* $P < 0.05$ , \*\* $P < 0.01$ , \*\*\* $P < 0.001$ .

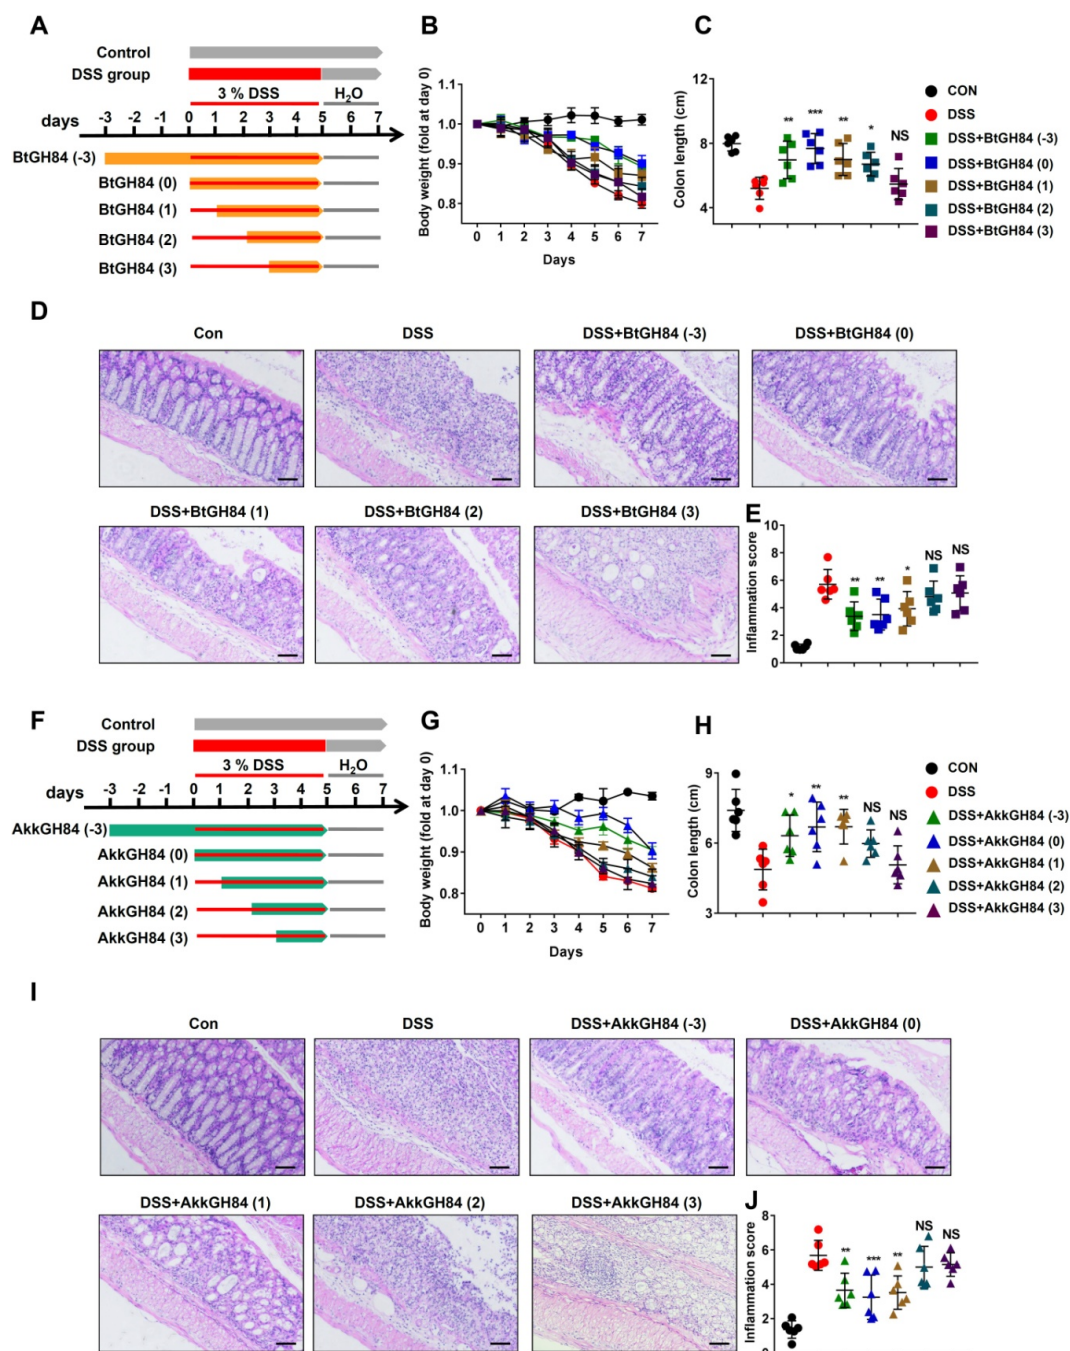

Supplement: gutjnl-2020-322468supp011_data_supplement.pdf [file gutjnl-2020-322468supp011_data_supplement.pdf]
