# Supplementary material for: Bacterial O-GlcNAcase genes abundance decreases in ulcerative colitis patients and its administration ameliorates colitis in mice
Source: HighWire-hosted journal article supplement (doi:10.1136/gutjnl-2020-322468), 2020-12-12

**Supplementary Figure 11.** Delivery of enzymes to the colon tissue of mice. Pectin/zein containing enzymes were administered to mice through gavage, and mice were sacrificed after a 4-hour treatment. Paraffin-embedded colon tissues were used to determine enzymes distribution by immunofluorescence using anti-BSA, anti-BtGH84 or anti-AkkGH84 polyclonal antibody and Cy3-labeled secondary antibody (red). Nuclei were stained with DAPI (blue). Yellow scale bar: 200  $\mu$ m; white scale bar: 50  $\mu$ m.

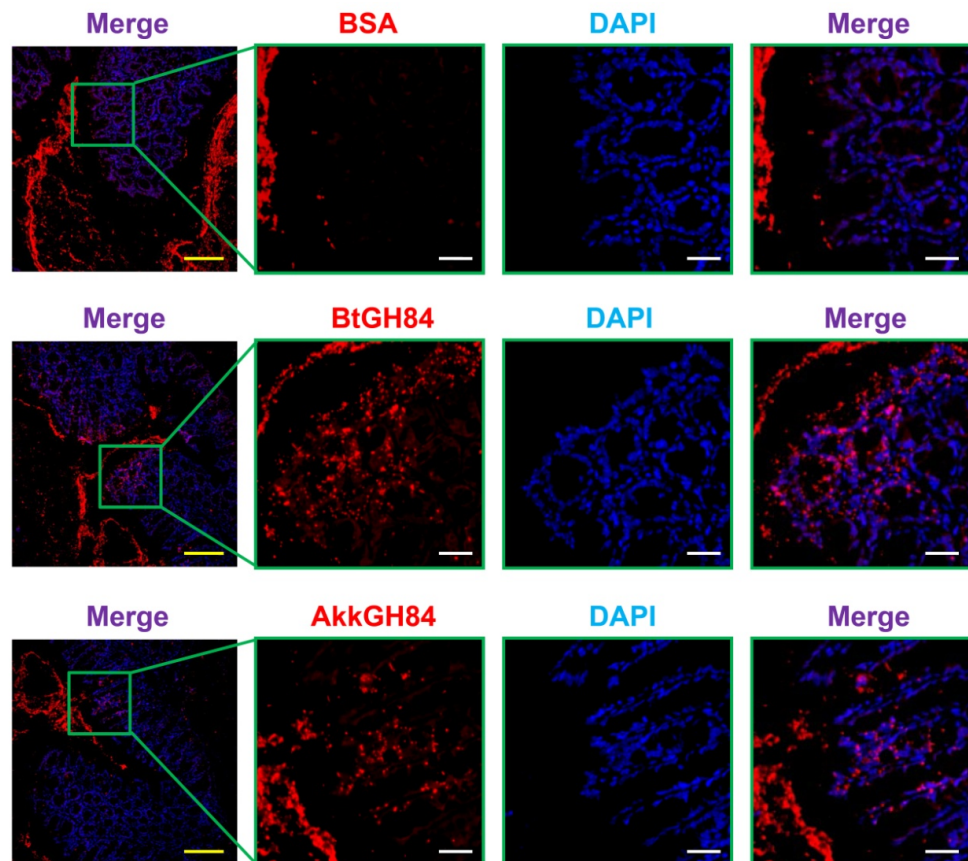

Supplement: gutjnl-2020-322468supp012_data_supplement.pdf [file gutjnl-2020-322468supp012_data_supplement.pdf]
